# Supplementary material for: Pharmacological and genetic manipulations at the µ-opioid receptor reveal arrestin-3 engagement limits analgesic tolerance and does not exacerbate respiratory depression in mice
Source: PubMed Central journal article supplement (PMC8581001; doi:10.1038/s41386-021-01054-x), 2021-07-13
Supplement: 41386_2021_1054_MOESM1_ESM.pdf [file 41386_2021_1054_MOESM1_ESM.pdf]

**Table S1. Morphine-induced analgesia and respiratory depression in WT, Arr-3 KO and RMOR mice**

| Mouse strains | AD <sub>50</sub> Values of morphine (mg/kg)<br>(95% confidence intervals) |                  |                                 | Respiratory rate (bpm)<br>AUC ± S.E.M. |                  |
|---------------|---------------------------------------------------------------------------|------------------|---------------------------------|----------------------------------------|------------------|
|               | Day 1                                                                     | Day 8            | Tolerance Index<br>(Fold shift) | Saline                                 | Morphine         |
| WT            | 4.6 (3.1-6.1)                                                             | 12.5 (10.7-15.2) | 2.7                             | 29525 ± 1440                           | 20398 ± 577 **** |
| Arrestin-3 KO | 3.9 (3.7-4.2)                                                             | 10.2 (8.9-11.7)  | 2.6                             | 27185 ± 943                            | 14974 ± 511 **** |
| RMOR          | 1.0 (0.9-1.1)                                                             | 1.6 (1.5-1.7)    | 1.6                             | 28029 ± 1121                           | 19520 ± 695 **** |

1. The AD<sub>50</sub> values and their 95% confidence intervals were calculated from Figure 1 using Prism.

2. The doses of morphine for respiratory measurements were the AD<sub>80</sub> values: 8 mg/kg (WT), 6 mg/kg (Arr-3 KO), and 1.5 mg/kg (RMOR).

\* significantly different from saline using 2-way ANOVA with Tukey's multiple comparisons test,

\*\*\*\* = P <0.0001

**Table S2. Peak respiratory depression by genotype**

| Mouse strains | % of Baseline at Maximum Inhibition. |                |                 |
|---------------|--------------------------------------|----------------|-----------------|
|               | Saline                               | Morphine       | Dose<br>(mg/kg) |
| C57B/L6       | 59.2 ± 2.8                           | 41.6 ± 2.3**   | 8               |
| Arrestin-3 KO | 72.4 ± 3.9                           | 38.4 ± 1.7**** | 6               |
| RMOR          | 62.1 ± 5.5                           | 46.4 ± 3.8     | 1.5             |
| 129SvJ        | 62.9 ± 2.8                           | 60.7 ± 3.7     | 8               |

\* significantly different from saline using 2-way ANOVA with Tukey's multiple comparisons test, \*\* = P <0.01,

\*\*\*\* = P <0.0001

**Table S3. Effect of opioid agonists on arrestin-3 recruitment *in vitro***

| Agonist       | Arrestin-3 recruitment |                        |
|---------------|------------------------|------------------------|
|               | EC50 (uM)              | E <sub>max</sub> (%)   |
| DAMGO         | 0.7 (0.4 - 1.3)        | 100.0 (89.6 - 111.5)   |
| Morphine      | 0.7 (0.5 - 1.0)        | 33.8 (32.4 - 36.3)**** |
| Methadone     | 0.8 (0.5 - 1.2)        | 86.0 (79.7 - 92.9)     |
| Fentanyl      | 0.2 (0.1 - 0.3)        | 94.9 (87.9 - 102.2)    |
| Buprenorphine | ND                     | ND                     |
| Oxycodone     | 17.4 (9.2 - 40)****    | 78.9 (60.1 - 121.3)*   |
| TRV130        | 0.6 (0.1 - 2.6)        | 2.2 (1.7 - 2.9)****    |

“ND” = Not detectable

\* significantly different from DAMGO using one-way ANOVA with Dunnett’s multiple comparisons test,

\* = P <0.05, \*\*\*\* = P <0.0001

\*arrestin-3 recruitment was measured in CHO cells stably expressing the  $\mu$ -opioid receptor

**Table S4. The effects of opioid agonists on analgesia, respiratory depression and tolerance to these effects**

| Agonists      | Analgesia<br>AD <sub>50</sub> (mg/kg)<br>(95% confidence intervals) |                     |            | % of baseline Respiratory Rate<br>AUC± S.E.M.<br>(Baseline @ 20% for 80 min) |            |                               |                             |
|---------------|---------------------------------------------------------------------|---------------------|------------|------------------------------------------------------------------------------|------------|-------------------------------|-----------------------------|
|               | Day 1                                                               | Day 8               | Fold shift | Day 1                                                                        | Day 8      | Ratio (1)<br>(Day 1: Vehicle) | Ratio (2)<br>(Day 8: Day 1) |
| Morphine      | 4.63 (3.1–6.1)                                                      | 12.5 (10.7-15.2)    | 2.7        | 3178 ± 183****                                                               | 3155 ± 129 | 0.63                          | 0.99                        |
| Methadone     | 4.56 (4.0-5.2)                                                      | 5.3 (4.7-6.1)       | 1.2        | 2238 ± 186****                                                               | 1976 ± 146 | 0.44                          | 0.88                        |
| Fentanyl      | 0.052 (0.044-0.059)                                                 | 0.077 (0.069-0.087) | 1.5        | 3144 ± 306****                                                               | 3148 ± 251 | 0.62                          | 1.00                        |
| Buprenorphine | 0.22 (0.19-0.25)                                                    | 0.66 (0.61-0.74)    | 3.0        | 4570± 235                                                                    | 3864 ± 233 | 0.90                          | 0.85                        |
| Oxycodone     | 2.57 (2.2-2.9)                                                      | 5.79 (5.0-6.9)      | 2.3        | 3688 ± 99***                                                                 | 3527 ± 198 | 0.73                          | 0.96                        |
| TRV130        | 1.5 (0.13-1.85)                                                     | 5.7 (5.3-6.1)       | 3.8        | 3472 ± 208****                                                               | 3144 ± 161 | 0.65                          | 0.91                        |

1. Vehicle is saline for all except TRV130. The AUC ± SEM for saline is 5072 ± 266

2. Vehicle is 1.5% DMSO in saline for TRV130. The AUC ± SEM for 1.5% DMSO is 5311 ± 220.

\* significantly different from vehicle using one-way ANOVA with Dunnett's multiple comparisons test,

\*\* = P <0.01, \*\*\* = P <0.001, \*\*\*\* = P <0.0001

**Table S5. Maximum respiratory depression by opioid agonists**

| Agonists      | % of Baseline at<br>Maximum Inhibition | Ratio<br>(Drug: Vehicle) |
|---------------|----------------------------------------|--------------------------|
| Morphine      | 41.6 ± 2.3                             | 0.70                     |
| Methadone     | 35.1 ± 2.3                             | 0.60                     |
| Fentanyl      | 45.7 ± 5.2                             | 0.77                     |
| Buprenorphine | 64.6 ± 4.2                             | 1.09                     |
| Oxycodone     | 47.7 ± 2.1                             | 0.81                     |
| TRV 130       | 45.4 ± 2.7                             | 0.85                     |

1. Maximums were compared to all other drugs with an ordinary one-way ANOVA and Tukey's multiple comparisons test (ns.)

1. Vehicle is saline for all except TRV130. The peak respiratory depression ± SEM for saline is 59.2 ± 2.8.

2. Vehicle is 1.5% DMSO in saline for TRV130. The peak respiratory depression ± SEM for 1.5% DMSO is 53.2 ± 4.9.

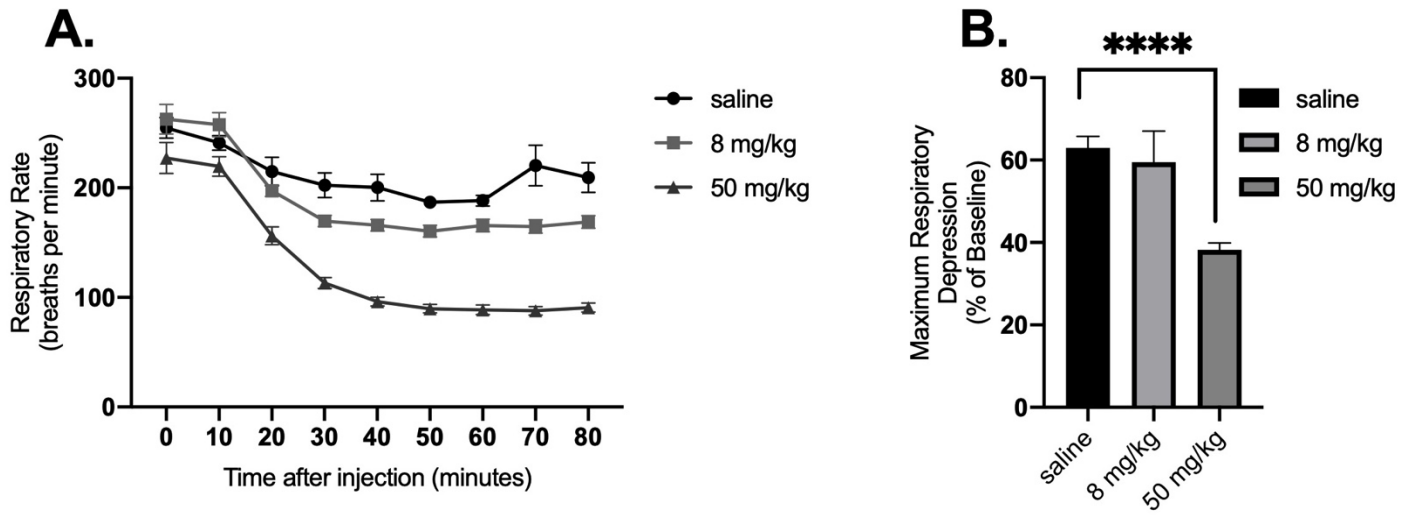

**Figure S1. High morphine is required to produce respiratory depression in 129SvJ mice** (A) Respiratory rates in 129SvJ mice with morphine versus saline. (B) Peak respiratory rates. (Ordinary one-way ANOVA,  $F = 20.79$ ,  $P < 0.0001$ ).

● morphine    ■ methadone    ▼ fentanyl    ● oxycodone    ◆ buprenorphine    ▲ TRV 130

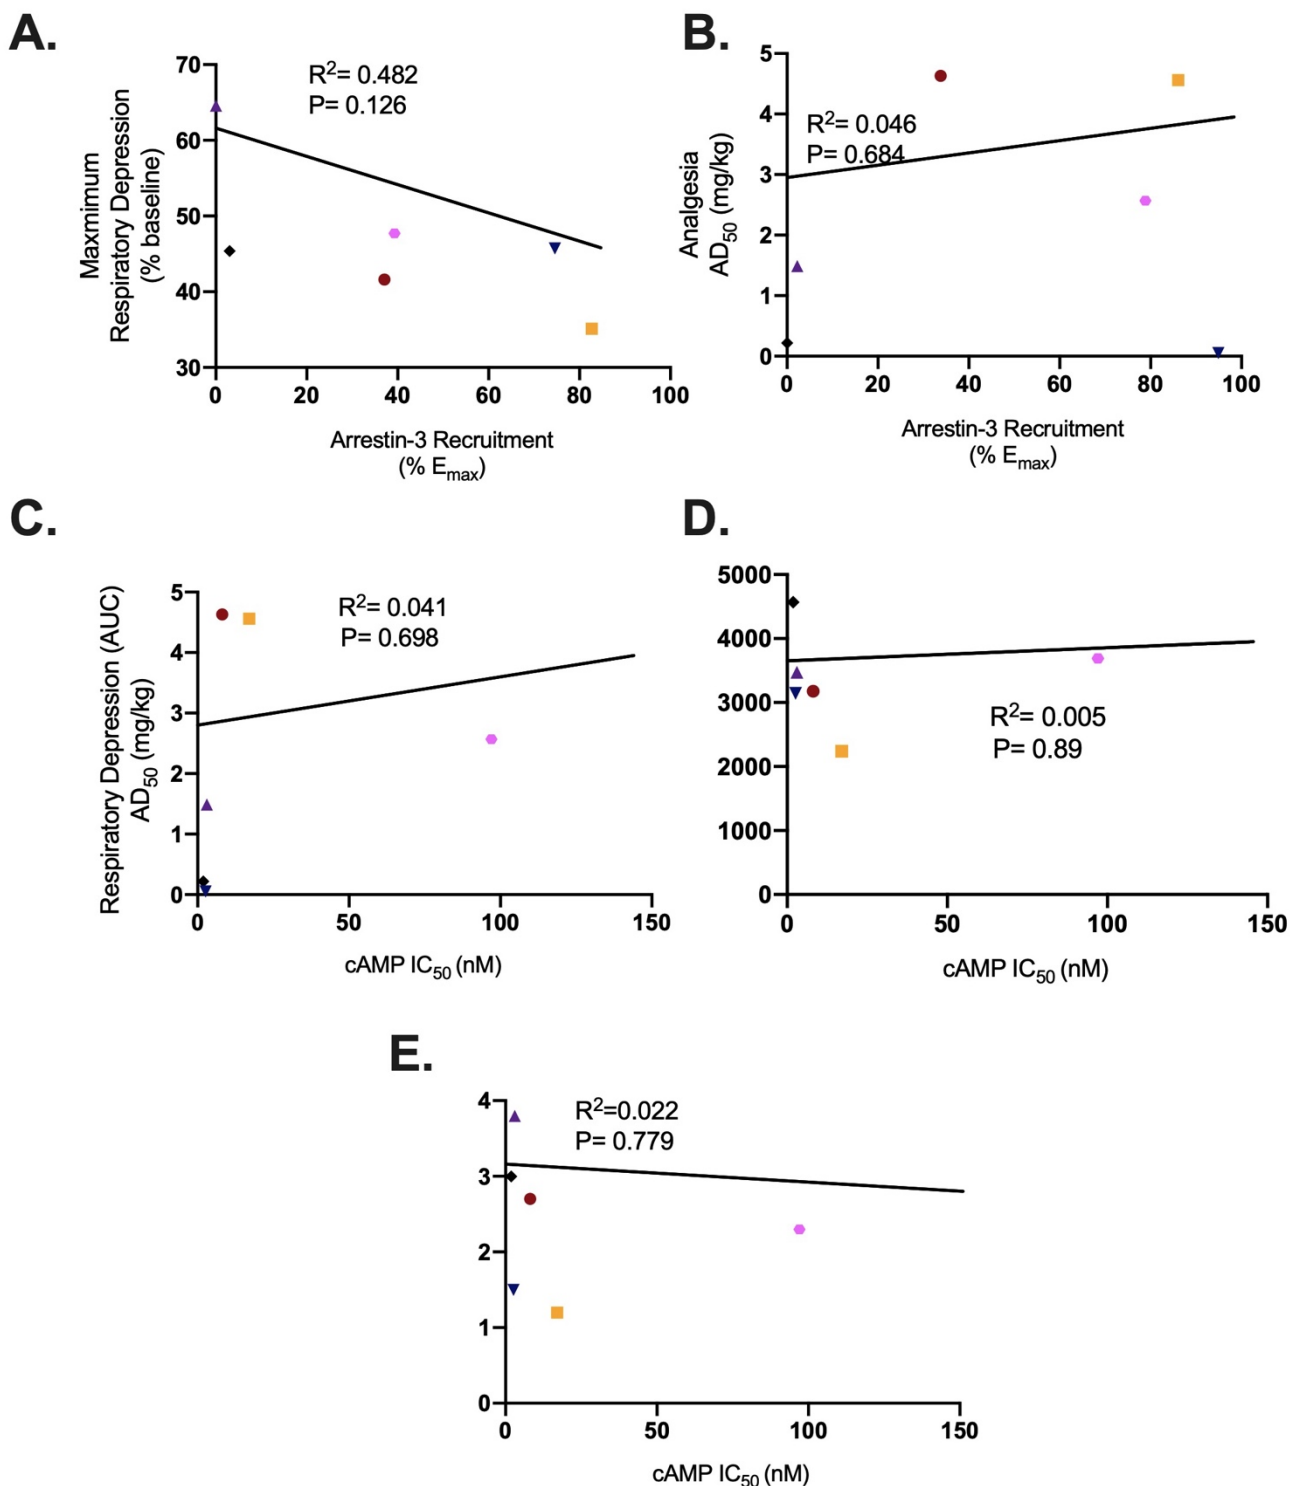

**Figure S2. Correlation between the *in vitro* arrestin-3 recruitment or cAMP inhibition of the tested drugs and their respective *in vivo* respiratory depression and analgesic effects.** Arr-3 recruitment plotted against peak respiratory inhibition (A) and analgesia (B). cAMP IC<sub>50</sub> values plotted against AD<sub>50</sub> values for (C) respiratory depression AUC and (D) analgesic tolerance AUC. (E) Analgesic tolerance index was the fold-shift of AD<sub>50</sub> values calculated in Table 2. The respiratory depression AUC and peak inhibition were calculated from Figure 3D. Pearson correlation was used for the statistical analysis.

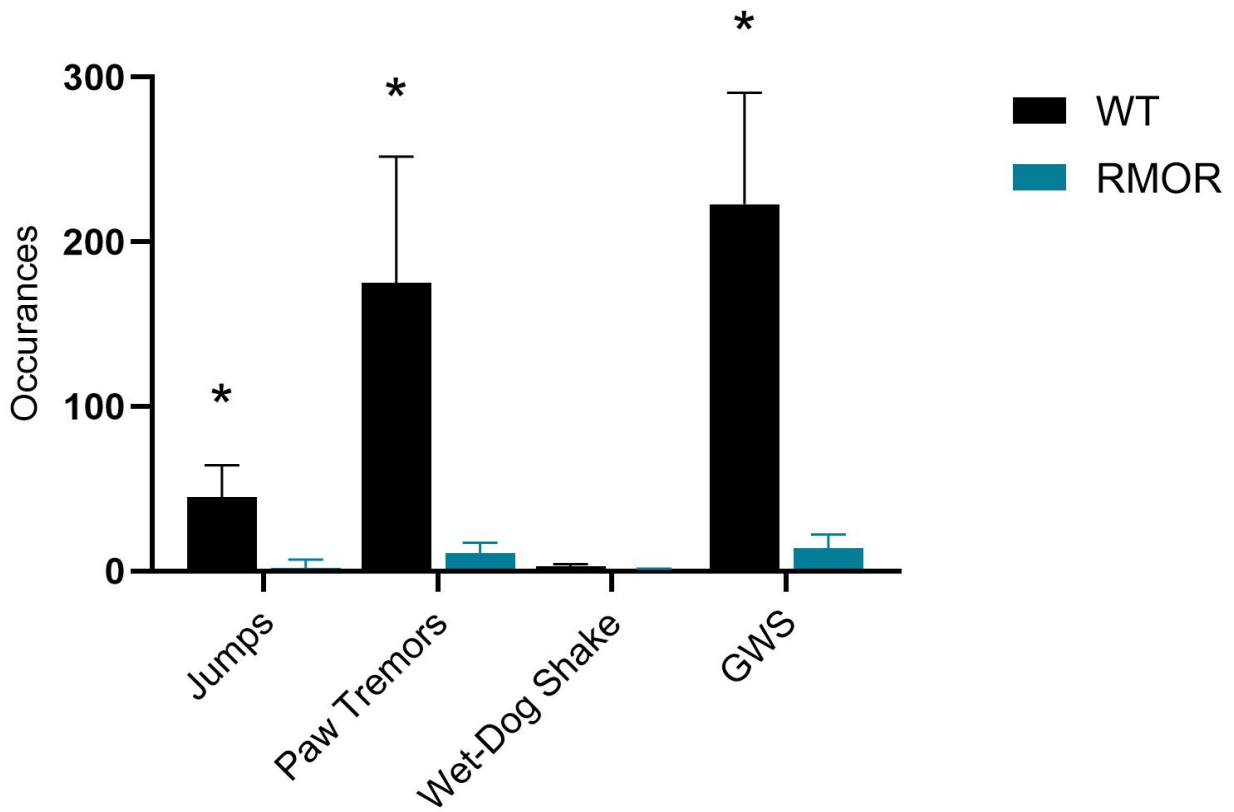

**Figure S3. WT but not RMOR mice show dependence to morphine.** Mice were treated with the AD<sub>80</sub> dose of morphine (Figure 1) for 8 days. 30 minutes following the last dose of morphine, mice were administered naloxone (5 mg/kg) and withdrawal signs were scored by investigator blind to genotype. GWS, global withdrawal score is the sum of all withdrawal signs equally weighted. \* = P <0.05 using two-tailed student's t-test.
